# Supplementary material
Source: MDPI journal article supplement (https://www.mdpi.com/2073-4344/11/4/518)
Supplement: s1 [file s1]

Supplementary Materials

# Lipase Immobilized on MCFs as Biocatalysts for Kinetic and Dynamic Kinetic Resolution of *sec*-Alcohols

Dominika Stradomska <sup>1</sup>, Monika Heba <sup>2</sup>, Aleksandra Czernek <sup>2</sup>, Nikodem Kuźnik <sup>2</sup>, Danuta Gillner <sup>2,3</sup>, Katarzyna Maresz <sup>4</sup>, Wojciech Pudło <sup>1</sup>, Andrzej Jarzębski <sup>1,4</sup> and Katarzyna Szymańska <sup>1,\*</sup>

<sup>1</sup> Department of Chemical Engineering and Process Design, Silesian University of Technology, 44-100 Gliwice, Poland; dominika.stradomska@polsl.pl (D.S.); wojciech.pudlo@polsl.pl (W.P.); andrzej.jarzebski@polsl.pl (A.J.)

<sup>2</sup> Department of Organic Chemistry, Bioorganic Chemistry and Biotechnology, Silesian University of Technology, 44-100 Gliwice, Poland; monika.heba@polsl.pl (M.H.); aleksandracernek@wp.pl (A.C.); nikodem.kuznik@polsl.pl (N.K.); danuta.gillner@polsl.pl (D.G.)

<sup>3</sup> Biotechnology Center, Silesian University of Technology, 44-100 Gliwice, Poland

<sup>4</sup> Institute of Chemical Engineering, Polish Academy of Sciences, 44-100 Gliwice, Poland; k.kisz@iich.gliwice.pl

\* Correspondence: katarzyna.szymanska@polsl.pl

## Table of Contents:

1. Thermogravimetric analysis (Fig. S1-S3)
2. Process stability of immobilized lipase (Fig. S4)
3. GC chromatograms (Fig. S5-S7)

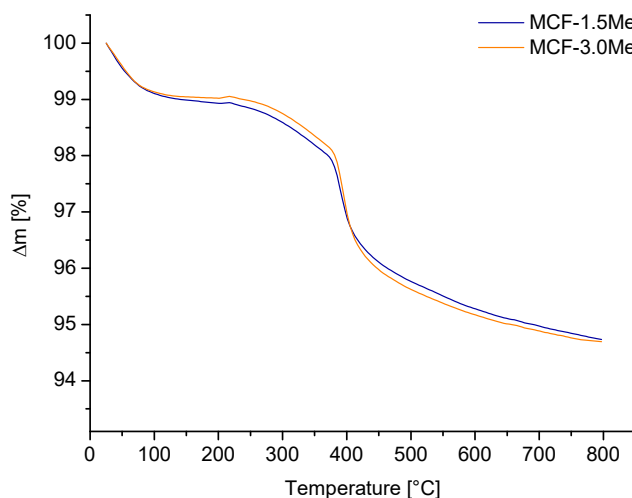

**Figure S1.** TG analysis of MCF-Me

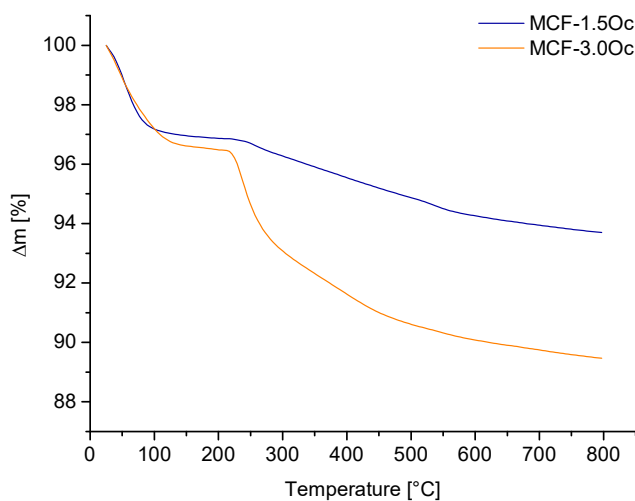

**Figure S2.** TG analysis of MCF-Oc

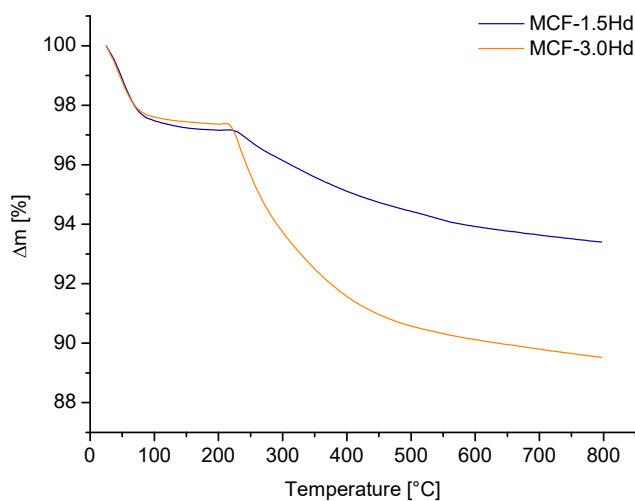

**Figure S3.** TG analysis of MCF-Hd

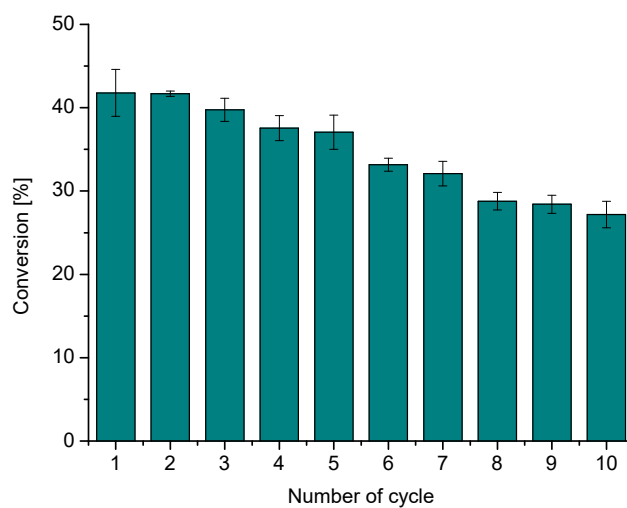

**Figure S4.** CALB-MCF-3.0Me catalytic cycles in the kinetic resolution of (*rac*)-1-phenylethanol

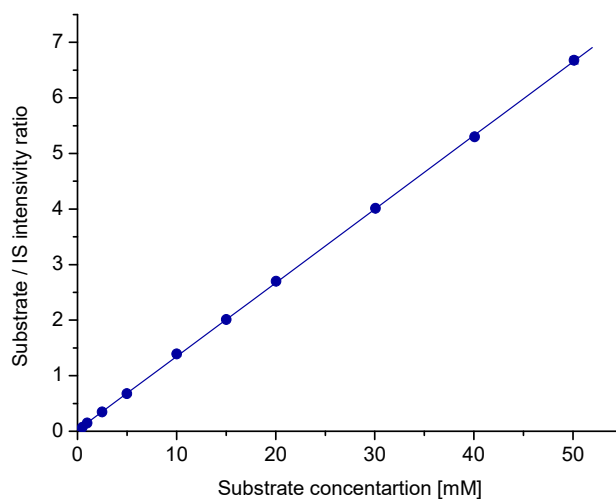

**Figure S5.** Calibration curve for the (*rac*)-1-phenylethanol with decane as an internal standard (IS)

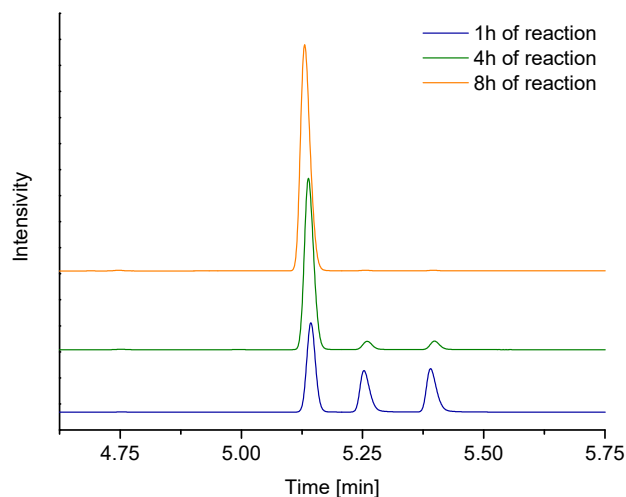

**Figure S6.** Chromatograms for the DKR of (*rac*)-1-phenylethanol with complex **2** and K<sub>3</sub>PO<sub>4</sub> (4.75 min – (*S*)-1-phenylethyl acetate, 5.14 min – (*R*)-1-phenylethyl acetate, 5.26 min – (*R*)-1-phenylethanol, 5.40 min – (*S*)-1-phenylethanol)

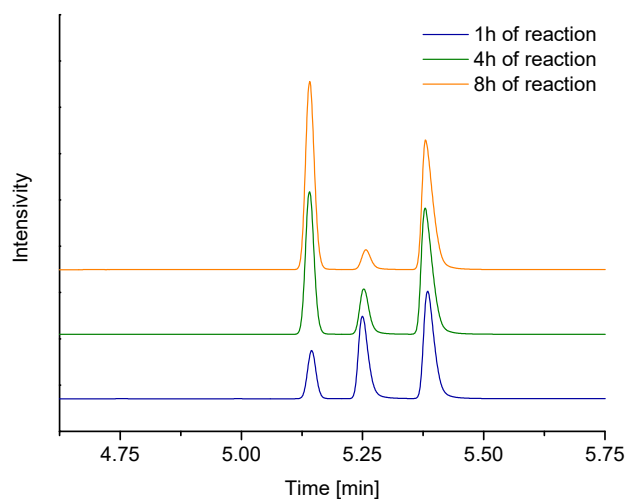

**Figure S7.** Chromatograms for the DKR of (*rac*)-1-phenylethanol with complex **2** and *t*-BuOK (4.75 min – (*S*)-1-phenylethyl acetate, 5.14 min – (*R*)-1-phenylethyl acetate, 5.26 min – (*R*)-1-phenylethanol, 5.40 min – (*S*)-1-phenylethanol)
